# 1 Stratified microbial communities are highly sensitive towards multiple 2 combined global change factors, revealing antagonistic and synergistic 3 effects

4  
5 Marcel Suleiman, Yves Choffat, Xue Zheng, Owen L Petchey

6  
7 Department of Evolutionary Biology and Environmental studies, University of Zurich

8  
9 Corresponding author: Marcel Suleiman, [marcel.suleiman@uzh.ch](mailto:marcel.suleiman@uzh.ch), Tel: +41 44 635 4773

## 10 11 **Competing interests**

12 The authors declare no competing financial interests.

## 13 **Abstract**

14 Microbial communities in many ecosystems are facing a broad range of global change  
15 scenarios, resulting in microbial changes and possibly regime shifts with unknown ecological  
16 consequences. While the influence of single stressors is already described in numerous  
17 studies, the effects of multiple stressors working simultaneously are still poorly understood.  
18 In this study, we used 240 highly replicable oxic/anoxic aquatic lab micro-ecosystems to  
19 understand the influence of four stressors (fertilizer, glyphosate, metal pollution, antibiotics)  
20 in all possible combinations at three different temperatures (20 °C, 24 °C, and 28 °C) to shed  
21 light into consequences of multiple stressors on different levels of organization, ranging from  
22 species abundance to community and ecosystem parameters. Our data reveal that (i)  
23 combination of specific stressors can change the biological consequence and direction  
24 compared to single stressors in all levels of organisation (ii), effects of stressor combinations  
25 are modified by temperature, and (iii) that the number of stressors applied also lead to  
26 significant changes. In sum, our study confirmed the need of investigating multiple stressors  
27 working simultaneously across different ecological levels of organisation.

28

## 29 Introduction

30

31 Microbial communities, as drivers of many ecosystems, must face increasing amounts and  
32 strengths of anthropogenic global change (Christensen et al. 2006; Jackson et al. 2016).  
33 Confrontation with fertilizer (Suleiman et al. 2017) and metal pollution (Xu et al. 2018a),  
34 pesticides like glyphosate (Solomon and Thompson 2003; Relyea 2009), antibiotics (Xu et al.  
35 2018b) and an ongoing temperature increase (Wu et al. 2011) force populations and whole  
36 ecosystems to develop in different ways compared to less or unaffected ones. For decades,  
37 many studies analysed and proved that even slight changes in environmental conditions can  
38 lead to large taxonomic and functional microbial change, and even to regime shifts, with  
39 potential (long term) consequences for biogeochemically cycles and ecological function of the  
40 affected habitat (Gruber 2011; Suleiman et al. 2021b).

41 While most studies so far focused on one global change stressor, recent studies  
42 (Christensen et al. 2006; Rillig et al. 2019; Suleiman et al. 2021a) indicated that multiple  
43 stressors applied simultaneously do not always show additive effects, which would be the  
44 sum of the individual stressors. Rather, they demonstrate that interaction effects can occur.  
45 These can be synergistic (combined effect greater than the sum of the effect of individual  
46 stressors) or antagonistic (combined effect less than the sum of the effect of individual  
47 stressors). Furthermore, it was shown, that not just the character of stressor, but also the  
48 number of factors combined plays a crucial role (Rillig et al. 2019). Nevertheless, the amount  
49 of studies testing three or more stressors for an experimental system in the lab remains very  
50 low (Rillig et al. 2019), which highlights the need of investigating combined effects on  
51 experimental ecosystems, and is a critical aspect of the research field of climate change  
52 microbiology (Hutchins et al. 2019).

53           The limited number of studies with three or more stressors may be in part due to the  
54   logistical demands of such experiments and the complexity of interpreting their results. For  
55   example, to assess all interactions, one needs a fully-factorial experimental design, and so  
56   experiments can very quickly become large. Regarding interpretation, it can be difficult to  
57   understand the meaning of interactions among more than three stressors, such that even if  
58   one would conduct a fully-factorial experiment, traditional methods for interpreting  
59   interactions (such as interaction plots) may be insufficient. Some studies have instead focused  
60   on the effect of variation in the number of stressors, and have applied only a subsample of all  
61   possible combinations (e.g. Brennan and Collins 2015; Rillig et al. 2019).

62           Another gap in understanding is how stressors and combinations of stressors act  
63   across levels of ecological organization, from individuals to ecosystem (Galic et al. 2018). For  
64   example, Galic et al (2018) in a case study of a model of amphipod feeding behavior, showed  
65   that responses to multiple stressors at the individual level were not consistent with those at  
66   higher levels of organization. In their case-study, the nature of this inconsistency would lead  
67   to underestimation of effects at population and ecosystem levels if effects at the individual  
68   level were assumed to hold across levels of organisation.

69           These gaps in knowledge are problematic. One reason is that interactions can be  
70   source of ecological surprises, i.e. if we assume additivity we can be surprised if there are  
71   interactions (Christensen et al 2006). Also, unless there are some generalities about  
72   interactions among drivers, we will never be able to predict the effect of a new (previously  
73   unobserved) combination of drivers, so interactions will also then be a surprise (Christensen  
74   et al 2006). Hence, we and others (e.g. Simmons et al 2021, Rillig et al 2018) are interested in  
75   discovering if there are any general patterns that will allow us to predict the effects of  
76   combinations of environmental changes. This report is about our search for signals of general

77 patterns in the effects of combinations of environmental drivers. For example, is the  
78 relationship between a biological variable and the number of drivers dependent on the level  
79 of ecological organization of the biological variable. And do the strength and nature of the  
80 interaction effects vary with level of ecological organization.

81           Microbial networks of aquatic ecosystems are complex (Christensen et al. 2006; DAVIS  
82 et al. 2010; Faust and Raes 2012), consisting of feedback reactions of numerous abiotic and  
83 biotic interactions (Singh et al. 2009), with and within specific functional microbial groups  
84 (Bush et al. 2017; Richardson et al. 2018). Recently, previous work indicated that these  
85 networks are sensitive to environmental change (Christensen et al. 2006; Shade et al. 2011,  
86 2012; Suleiman et al. 2021b, a), identifying these habitats as appropriate systems for study  
87 and understanding influences of global changes.

88           In this work, we applied four different global change stressors (fertilizer, glyphosate,  
89 metal pollution, antibiotics, and temperature) in all combinations possible with increasing  
90 temperature (20 °C, 24 °C, and 28 °C), on a recently developed and highly replicable stratified  
91 aquatic microbial lab system, resulting in a total number of 240 analysed experimental micro-  
92 ecosystems. Our experiment includes the analysis of several abiotic (oxygen, total nitrogen,  
93 total organic carbon, pH) and biotic variables (diversity richness, microbial community  
94 composition, genera abundances), since recent studies have shown that various levels of  
95 ecosystems can be affected (Weithoff et al. 2000; Shade et al. 2011, 2012; Suleiman et al.  
96 2021b). We hypothesize that (i) depending on the combinations of stressors the ecosystems  
97 will be driven in different directions and (ii) increasing temperatures can change the influence  
98 of combined stressors (iii) increasing number of stressors goes along with significant effects.

99

100

## 101 Material and methods

102

### 103 Experimental set up

104

105 Incubation of stratified microbial communities was performed in micro-ecosystems consisting  
106 of standard glass test tubes (4 mL volume). These test tubes were closed with plastic lids, with  
107 a small whole (0.5 mm) that allowed gas exchange between the headspace and the  
108 atmosphere. Each micro-ecosystem consisted of sediment and water samples taken in May  
109 from a small pond in Zurich, Switzerland (47°23'51.2"N 8°32'33.3"E, the temperature of 19  
110 °C, pH of 7) at a depth of 25 cm. Sediment was homogenized (30 min mixing) and subsequently  
111 supplemented with sterile 0.25 % crystalline cellulose, 0.25 % methyl-cellulose, 0.5 % CaSO<sub>4</sub>,  
112 0.1% CaCO<sub>3</sub>, and 0.005 % NH<sub>4</sub>H<sub>2</sub>PO<sub>4</sub>. Glass tubes were filled with a 3 mm layer of  
113 supplemented sediment and covered with 3.5 mL pond water (with 0.005 % NH<sub>4</sub>H<sub>2</sub>PO<sub>4</sub>),  
114 resulting in 500 µL headspace. Microecosystems were incubated at room temperature for 2  
115 hours to let sediment settle, before the different treatments were applied. Incubation took  
116 place for 23 days (about three and a half weeks) at 20 °C, 24 °C and 28 °C, respectively.

### 117 Multiple stressor treatments

118

119 In this work, there were two levels of four stressors, namely NH<sub>4</sub>H<sub>2</sub>PO<sub>4</sub>-fertilizer (F),  
120 Glyphosate (G), metal pollution (M) and antibiotics (A). Furthermore, control micro-  
121 ecosystems (C) were used without application of any stressors. Additionally, the experiment  
122 was carried out at 20 °C, 24 °C and 28 °C under a dark-light cycle of 8:16 h, respectively. The  
123 temperature treatment and four stressor treatments were applied in a fully-factorial design.  
124 Five replicates per treatment combination resulted in 240 micro-ecosystems, according to the  
125 following design:

126

127 ["Control", "F", "G", "M", "A", "FG", "FM", "FA", "GM", "GA", "MA", "FGM", "FGA", "GMA", "FMA",  
128 "FGMA"] \* 5 replicates \* 3 Temperatures  
129 = 240 micro-ecosystems

130 For the stressor treatments, the following chemical compounds were added to the micro-  
131 ecosystems 2 hours after the assembly of the microecosystems:

- 132 •  $\text{NH}_4\text{H}_2\text{PO}_4$  in final concentration of 0.01 % as fertilizer (F), like used in a previous  
133 study (Suleiman et al., 2021)
- 134 • Glyphosate in final concentration of 0.0001 % (G) like used in a recent study of (da  
135 Costa et al. 2021)
- 136 • Trace element solution SL-10 final concentration 10x higher than recommended for  
137 metal pollution (M)
- 138 • Mixture of penicillin and ampicillin (0,05 mg/100 mL each) in final concentration of  
139 0.000005 % for antibiotic treatment (A), since such amounts were detected in  
140 natural aquatic habitats (Xu et al. 2018b)

141 Stressors were applied to the micro-ecosystems only on day 0; there were no further press  
142 or pulse perturbations.

#### 143 [Sampling and full length 16S rRNA sequencing](#)

144  
145 After incubation for 23 days, the whole micro-ecosystem was centrifuged for 5 min at 10.000  
146 rpm (sediment and water column together). DNA was extracted using ZymoBIOMICS DNA  
147 Miniprep Kit (ZymoResearch), following the manufacturer's instructions. Full-length 16S rRNA  
148 gene amplification was performed using the primer pair 27F forward primer (5'-  
149 AGRGTTYGATYMTGGCTCAG-3') and 1592R reverse primer (5'-RGYTACCTTGTTACGACTT-3'),  
150 like reported previously (Suleiman et al., 2021).

151 PCR products were visualized on an 1 % (w/v) agarose gel and were pooled for  
152 sequencing in equal concentrations. PCR product pools were purified using AMPure® PB beads  
153 (PacBio). Sequencing was performed at the Functional Genomic Center Zürich, Switzerland,  
154 and performed using SMRT Technology (PacBio) as reported previously (on three SMRT  
155 chips). Sequencing data quality were checked using the PacBio SMRT Link software.

156  
157 [Bioinformatics](#)

158  
159 Sequencing data were filtered based on primer sequences, length (1300-1600 bp), quality,  
160 error rates and chimeras using *dada2* (Callahan et al. 2016). The final sequence table was  
161 aligned using SILVA ribosomal RNA database (Quast et al. 2012), using version 138 (non-  
162 redundant dataset 99). A phyloseq object was created using the *phyloseq* package (McMurdie  
163 and Holmes 2013), consisting of amplicon sequence variant (ASV) table, taxonomy table and  
164 sample data. For further analysis, the R packages *phyloseq* (McMurdie and Holmes 2013) and  
165 *vegan* (Oksanen et al. 2019) were used.

166 In order to compare the effects of the multiple stressors, we analysed various  
167 response variables, namely community composition based on NMDS1, NMDS2, Shannon  
168 richness, oxygen, TN, TOC, and abundances of specific genera and functional groups.

169 Microbial community composition was quantified using NMDS (non-metric  
170 multidimensional scaling) based on Bray-Curtis scores with the *metaMDS* function of the  
171 *vegan* R package (Oksanen et al. 2019), with three dimensions used (k=3, try=100). Shannon  
172 richness was calculated using *phyloseq* package (McMurdie and Holmes 2013). Functional  
173 groups were constructed by filtering for cyanobacterial and sulfur-related species, which  
174 resulted in a reduced dataset consisting of members of the order of *Cyanobacteriales*,  
175 *Chromatiales*, *Synechococcales*, *Chlorobiales*, *Leptolyngbyales*, *Desulfobulbales*,

176 *Desulfovibrionales, Limnotrichales and Campylobacterales*. Detailed scripts will be available  
177 on zenodo and github within the next version of this manuscript.

## 178 Measurement of abiotic factors

179  
180 Oxygen concentration was measured 1.5 cm below the water/air interphase using an  
181 oxygen dipping probe (PreSens, Germany) at the last day of incubation. pH was measured in  
182 the supernatant of the centrifuged micro-ecosystem, as well as total nitrogen (TN) and total  
183 organic carbon using a TOC analyser.

## 184 Results

185  
186 We first results about the microbial community and genera abundances of the 240 micro-  
187 ecosystems (Fig. 1), then, the impact of stressor combination as well as number of stressors  
188 were calculated for diversity richness (Shannon), community structure (NMDS1), community  
189 structure of a subpopulation, as well oxygen and pH (Fig. 2). Additional abiotic and biotic  
190 variables were investigated (NMDS2, total nitrogen, total carbon) and can be find in detail in  
191 the Supplementary Fig. 3. The summary results of all variables (species, community,  
192 ecosystem) analysed based on the impact of stressor combination can be found in Fig. 3, and  
193 the influence of number of stressors in Fig. 4.

194 In total, 20'319 unique ASVs were identified after running the dada2 pipeline. After  
195 filtering to retain ASVs that appear at least in a rel. abundance of 0.1 % in at least one sample,  
196 the total number of reads decreased to 5830 taxa. The control micro-ecosystems consisted  
197 of mainly cyanobacteria (e.g. *Phormidaceae*) and phototrophic sulfur bacteria (specially  
198 *Chromatiaceae*) (Fig. 1 a + b, Supplementary Fig. 1). Depending on the stressor combination  
199 and temperature, the microbial communities and genera abundances showed strong  
200 differences compared to the controls. Micro-ecosystems facing stressors of glyphosate and



201 metal pollution, as a single stressor or in combination, were still dominated by members of  
202 *Phormidiaceae* and *Chromatiaceae* like the controls, but in all remaining treatments the  
203 abundance of members of these families was strongly decreased (Supplementary Fig. 1).  
204  
205 Also on genus level, we observed shifts in microbial composition depending on stressor  
206 combination and temperature (Fig. 1 b). The cyanobacterial genus *Tychonema* is highly  
207 abundant in metal pollution treatment, and with increasing temperature also in glyphosate +  
208 metal pollution treatments (20 % at 28 °C, 7 % at 20 °C). *Chromatium*, in contrast, appears in  
209 several treatments and reached highest rel. abundance at 20 °C when confronted with G:M  
210 (20 %), but vanished with increasing temperature in all treatments (< 5%). Statistical analysis  
211 of the relative abundance dependent on stressor combinations and temperature were  
212 performed on genus level for *Tychonema*, *Sulfuricurvum* and *Chromatium*, as representative  
213 species for Cyanobacteria and sulfur-depending bacteria (Fig. 3). Statistical analysis confirmed  
214 significant changes of relative species abundance depending on stressors, their combination  
215 and the temperature, but also depended on number of stressors applied (Fig. 4).

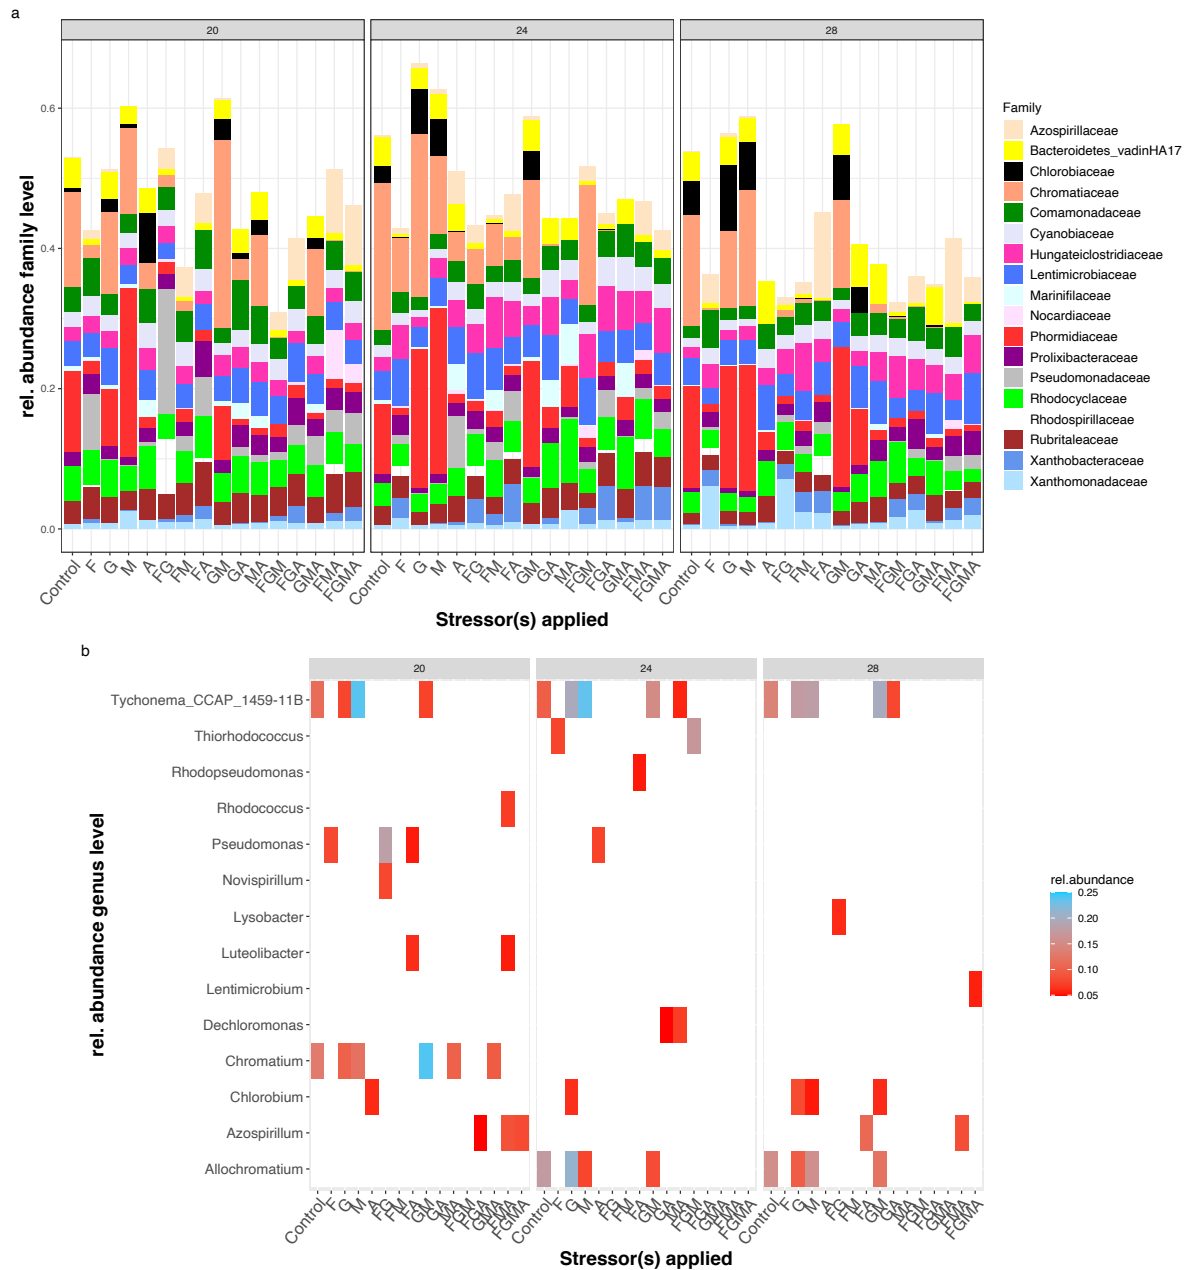

216  
 217 **Fig. 1 Overview of microbial communities and genera abundance depending on temperature and stressors combined. (a)**  
 218 Microbial community composition (mean per 5 replicates) on family level. Taxa with rel. abundance > 5 % shown. **(b)** Relative  
 219 abundance of specific genera with rel. abundance > 5 % for each stressor combination at each of the three temperatures.  
 220 White color represents a relative abundance < 5 %.

221  
 222  
 223  
 224  
 225 ASV diversity of the micro-ecosystems changed depending on the combination of  
 226 stressors (Fig. 2a+b), resulting in Shannon index values between 3 and 7, with the majority of  
 227 samples between 5 and 6, indicating a high diversity in most of the micro-ecosystems. Several  
 228 significant stressor treatments and combinatios were identified, namely temperature

229 increase ( $p = 1.41e-03$ ), fertilizer ( $p 9.32e-05$ ), antibiotics ( $p 7.85e-07$ ), as well as combination  
230 of fertilizer+antibiotics ( $p 3.82e-05$ ) and fertilizer+antibiotics+glyphosate ( $p 3.02e-02$ ) (Fig.  
231 2a). All listed significant stressor combinations had a positive effect on diversity, except of  
232 temperature increase to 28 °C and fertilizer:antibiotic treatment (Fig. 3). Interestingly, the  
233 negative effect of fertilizer:antibiotic was reversed to a positive effect again by adding  
234 glyphosate, while the treatment of glyphosate alone had no impact (Fig. 2a, Fig. 3). When  
235 analysing the effect of number of stressors and temperature increase on diversity, just  
236 temperature was identified to have a significant effect, but the number of stressors had no  
237 impact (Fig. 2b, Fig. 4).

238         The influence of multiple stressors on microbial community composition was analysed  
239 using NMDS, and fertilizer was identified as a key stressor for shifting microbial communities  
240 (NMDS1  $p 5.11e-77$ ) (Fig. 2b+c, Supplementary Figure 2). Numerous stressor combinations  
241 showed significant differences for NMDS score 1 and NMDS score 2 compared to the controls  
242 (Fig. 2c for NMDS1, Supplementary Fig. 3 for NMDS2, Fig. 3 for both), ranging from single to  
243 four-factorial combined stressors. Different impact directions (positive or negative score  
244 change) of the estimates can be identified depending on the stressor combinations (Fig. 2c,  
245 Fig. 3). The three-way interaction of fertilizer+antibiotics+temperature on NMDS1 score is a  
246 good example how combination of stressors can change the impact direction (Fig. 5): When  
247 no fertilizer was present, the NMDS1 score was negative, while in presence of fertilizer, the  
248 NMDS1 score was positive. The combination of antibiotics and temperature changed  
249 additionally the magnitude of the NMDS1 score. NMDS1 and NMDS2 scores were affected by  
250 number of stressors ( $p 5.07e-17$  and  $p 3.96e-04$ , respectively), but not by total number of  
251 stressors interacting with temperature (Fig. 2d, Fig. 4). The number of stressors did also affect  
252 NMDS1, but not NMDS2 scores (Fig. 2f, Fig. 4).

253 Analysis of the subset of cyanobacteria, phototrophic sulfur bacteria and sulfate-  
254 reducing bacteria confirmed the trends observed for NMDS of the whole data set (Fig. 2e for  
255 NMDS1, Supplementary Fig. 3 for NMDS2, Fig. 3 for both), but showed slight differences on  
256 three-factorial and four-factorial stressor combinations.

257 Oxygen concentration was highly dependent on the stressor combinations used, and  
258 various strong effects were identified (Fig. 2g), both positive and negative in direction. All  
259 stressors combined had a negative effect on oxygen concentration ( $p = 4.04e-02$ , non-  
260 standardised estimate - 6.1). The number of stressors applied had a strong effect on the  
261 oxygen concentration ( $p = 3.02e-05$ ), as well as temperature ( $p = 4.7e-08$ ) and the interaction of  
262 temperature + number of factors ( $p = 0.04$ ) (Fig. 2h, Fig. 4).

263 The pH of the micro-ecosystems was influenced by numerous treatment  
264 combinations, but the strongest influences was identified as fertilizer addition, which  
265 decreased the pH from 8.5 to 6.5 ( $p = 4.76e-118$ ). Stressor combinations that include fertilizer  
266 addition had lower magnitude though were of the same sign (Fig. 3). Number of stressors had  
267 a negative effect on pH, though this was mostly due to the strong influence of fertilizer and  
268 its greater probability of occurrence in treatment combinations with more stressors applied  
269 (Fig. 4).

270 Effects on total nitrogen were driven by addition of fertilizer ( $p = 1.58e-65$ ), and this was  
271 not changed by addition of other stressors (Fig. 3, Supplementary Fig. 3). Furthermore,  
272 number of stressors was highly affecting the total nitrogen concentration ( $p = 4.09e-12$ ), which  
273 again can be explained by fertilizer addition alone. Total carbon concentration was  
274 significantly negative affected by fertilizer ( $p = 0.006$ ), metal pollution ( $p = 0.025$ ) and  
275 temperature ( $p = 0.029$ ) (Fig. 3, Supplementary Fig. 3).

276

277

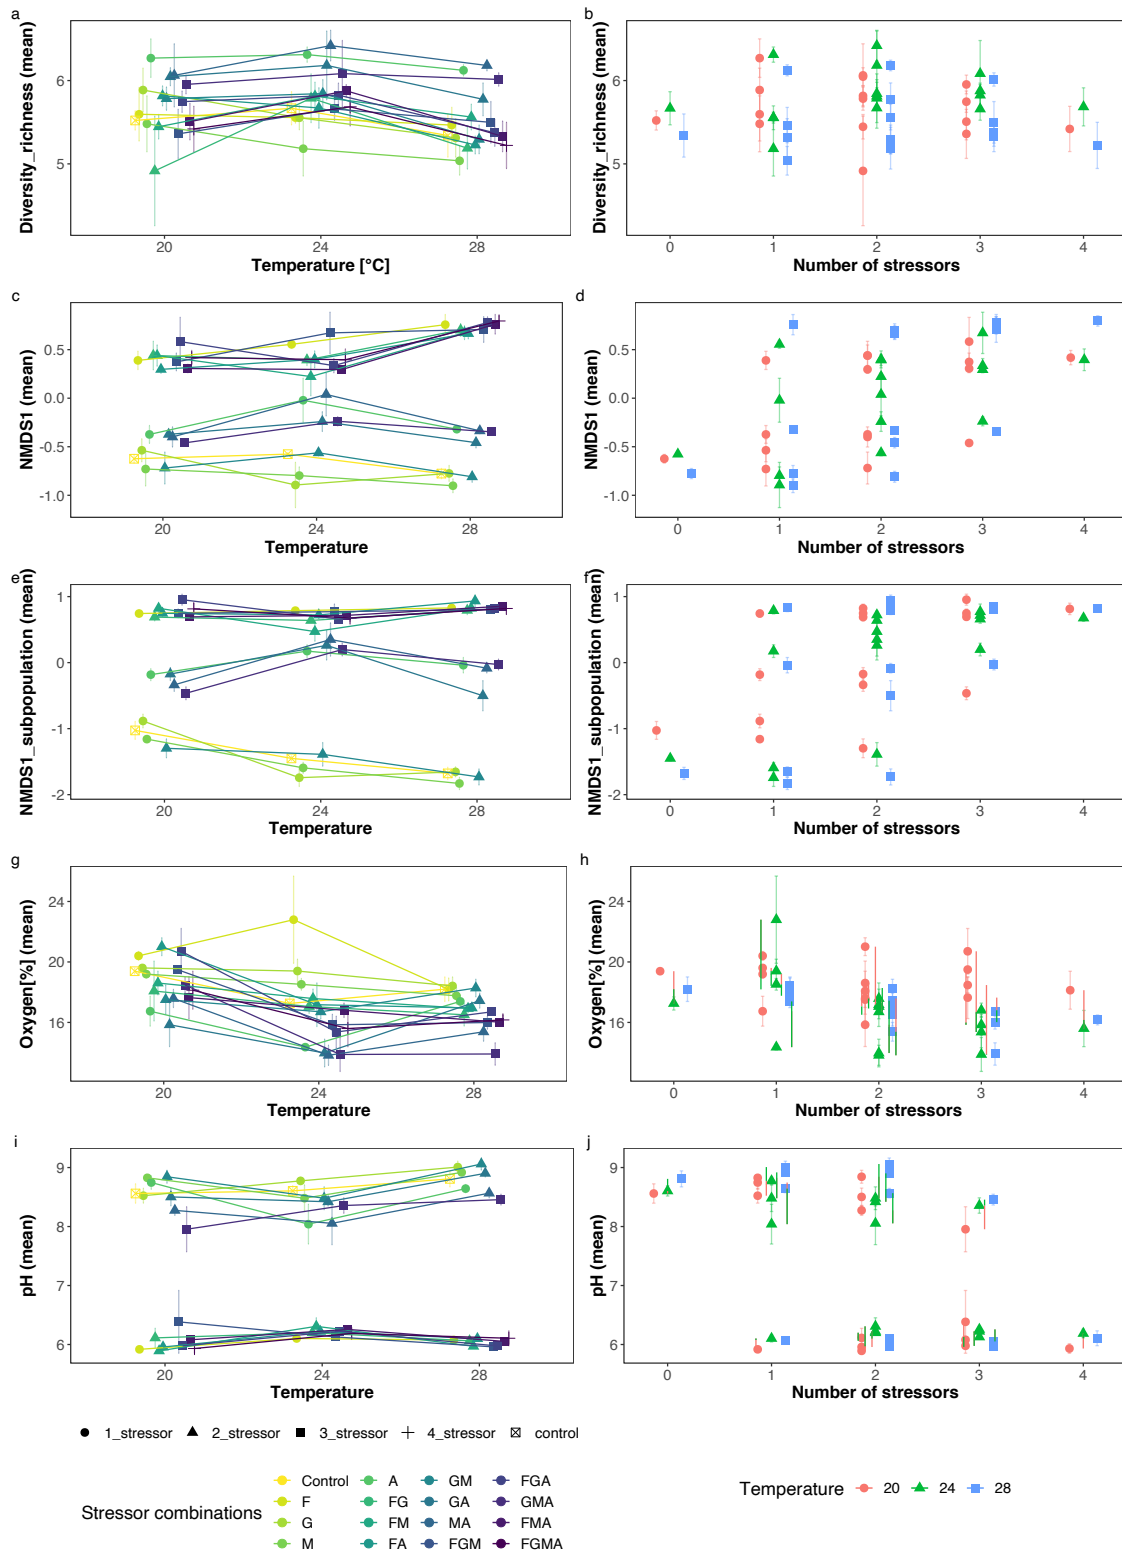

278

279 **Fig. 2 Effects of stressor combination and number of stressors on temperature applied for microbial community and**  
 280 **ecosystem variables.** Shannon diversity index in dependence on (a) temperature and stressor combination and (b)  
 281 temperature and number of stressors. NMDS1 scores in dependence on (c) temperature and stressor combination and (d)  
 282 temperature and number of stressors. NMDS1\_subpopulation scores dependence on (e) temperature and stressor  
 283 combination and (f) temperature and number of stressors. Oxygen concentration in dependence on (g) temperature and  
 284 stressor combination and (h) temperature and number of stressors. pH scores in dependence on (i) temperature and stressor  
 285 combination and (j) temperature and number of stressors. Standard errors are shown (n = 5 replicates).

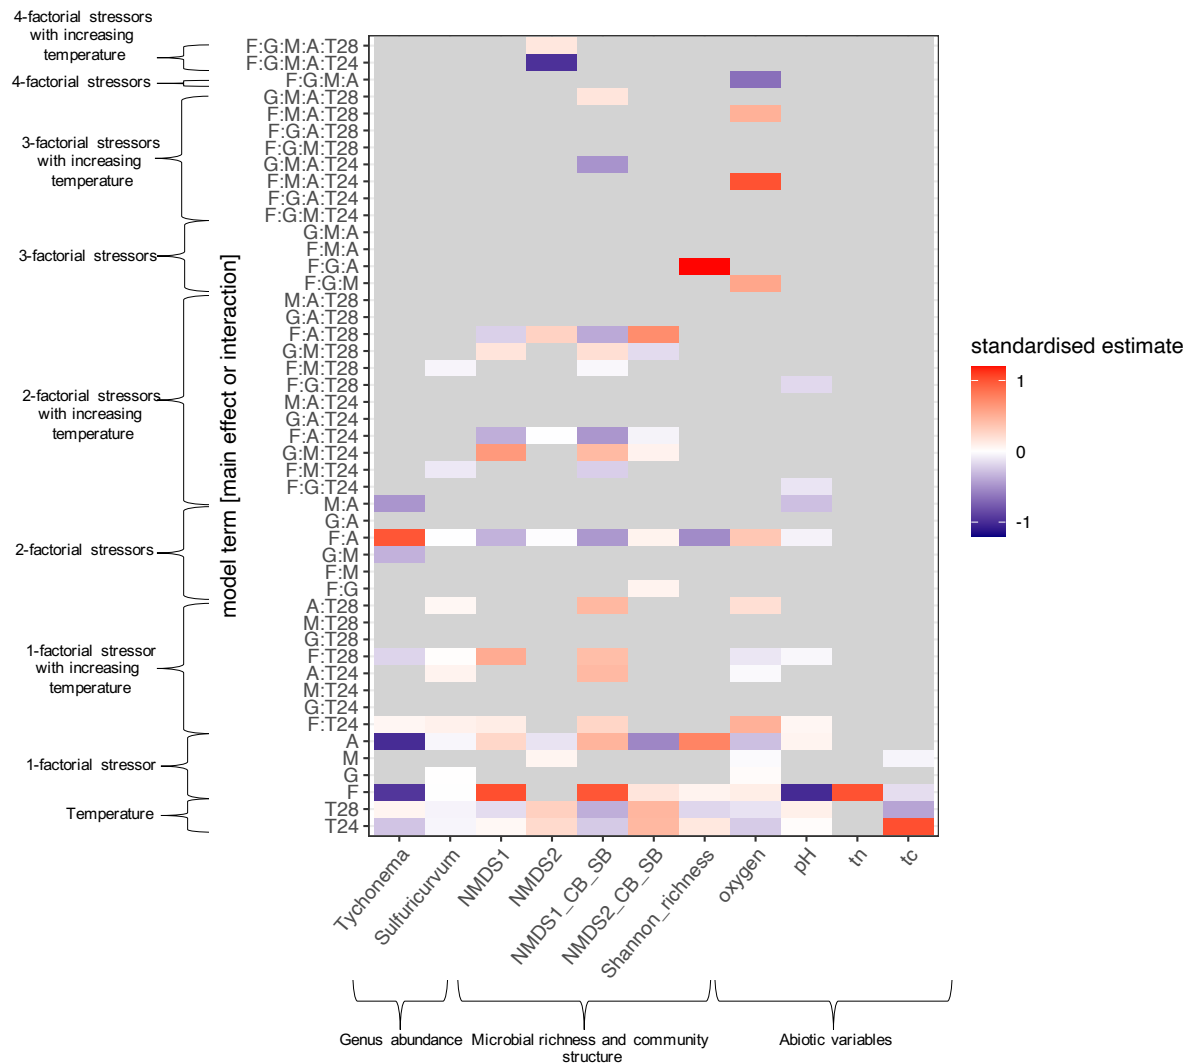

286  
287  
288  
289  
290  
291  
292  
293  
294  
295

**Fig. 3 Summary of statistical analyses of all variables analysed.**

We analysed how 12 variables (grouped by genus appearance, microbial richness and community structure and abiotic factors) are affected by four factors applied in all combinations possible and additionally at three different temperatures. Coefficient intervals (t-test) are shown for significant affected stressor combination (F-test p-value < 0.05). Color scheme illustrates the direction of the influence by the stressor (based on estimate positive or negative, estimates of each variable were standardized by dividing by highest estimate value. Grey: not significant based on f-test (p value > 0.05). tn= total nitrogen, tc= total carbon.

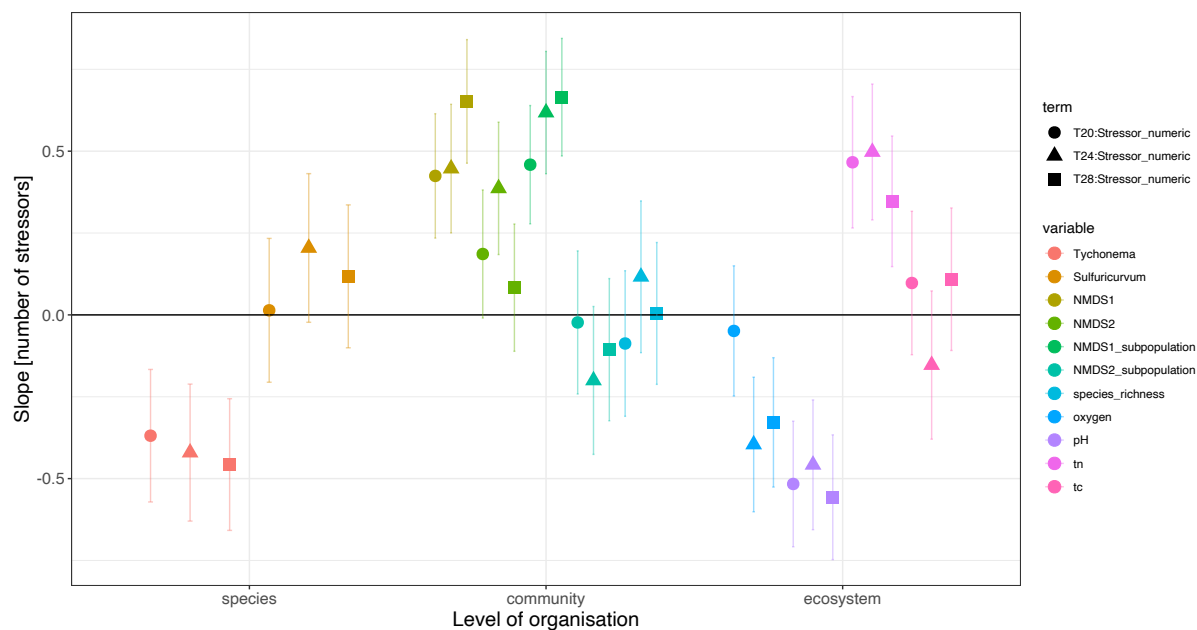

296  
 297 **Fig. 4 Slope of effect of number of stressors over temperature for all level or organisation (species, community,**  
 298 **ecosystem). 95 % confidence intervals are shown. tn=total nitrogen, tc=total carbon.**  
 299

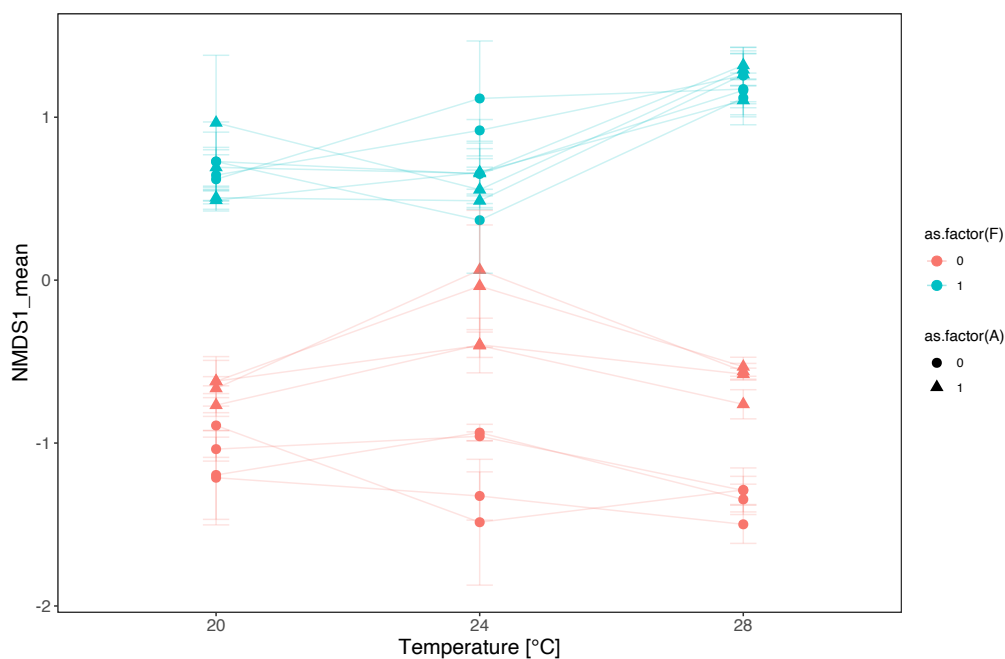

300  
 301  
 302 **Fig. 5 Visualization of the significant stressor (interactions) of temperature, fertilizer and antibiotics on NMDS1. NMDS1 is**  
 303 **affected by the presence of fertilizer, the presence of antibiotics and temperature, but also by the interactions of fertilizer-**  
 304 **antibiotics and Fertilizer-antibiotics-temperature.**  
 305

306

307

308

## 309 Discussion

310

311 Our study revealed strong evidence of effects of the combination and the total number of  
312 stressor on taxa abundances, community composition, and ecosystem properties, and  
313 therefore confirmed recent findings that multiple stressors are highly important to study  
314 (Rillig et al. 2019). The addition of a stressor, and/or temperature increase, could change the  
315 biological consequence of already applied stressors, even when the added stressor applied  
316 alone had no effect (Fig. 3). We observed three trends here: The addition of a further stressor  
317 can increase (e.g. F:A:T28), decrease (e.g. F:T28) or turn the whole direction of stressors which  
318 were already applied (e.g. F:A on *Tychonema* abundance, Fig. 6). This demonstrates clearly  
319 the need of analysing multiple stressors in all possible combinations. Furthermore, our study  
320 also confirmed that the number of stressors applied alone can have an effect on microbial  
321 communities and thereby provides some hope that number of stressors can be used as a  
322 predictor, though it is clear that individual stressor effects can greatly contributed to the  
323 effect of number of stressors (Rillig et al. 2019). The effect of number of stressors can be  
324 negatively (e.g. *Tychonema* abundance) or positively (e.g. total nitrogen), which highlights  
325 again the need of analysing various ecological response variables of species, microbial  
326 communities and the whole ecosystem.

327 While fertilizer, metal pollution and antibiotics had numerous effects when applied as  
328 a single stressor, glyphosate did not show this trend. This finding is probably concentration  
329 dependent and should be regarded with caution. Nevertheless, it is even more interesting  
330 that when adding glyphosate to more stressors it can have an effect (see e.g. diversity  
331 richness). Strong interactions were detected for antibiotics and fertilizer, and interestingly,  
332 these stressors revealed in combination different biological consequences compared to



333 applied as a single stressor, and temperature could also change the effects of the fertilizer  
334 antibiotic stressor duo again (Fig. 6).

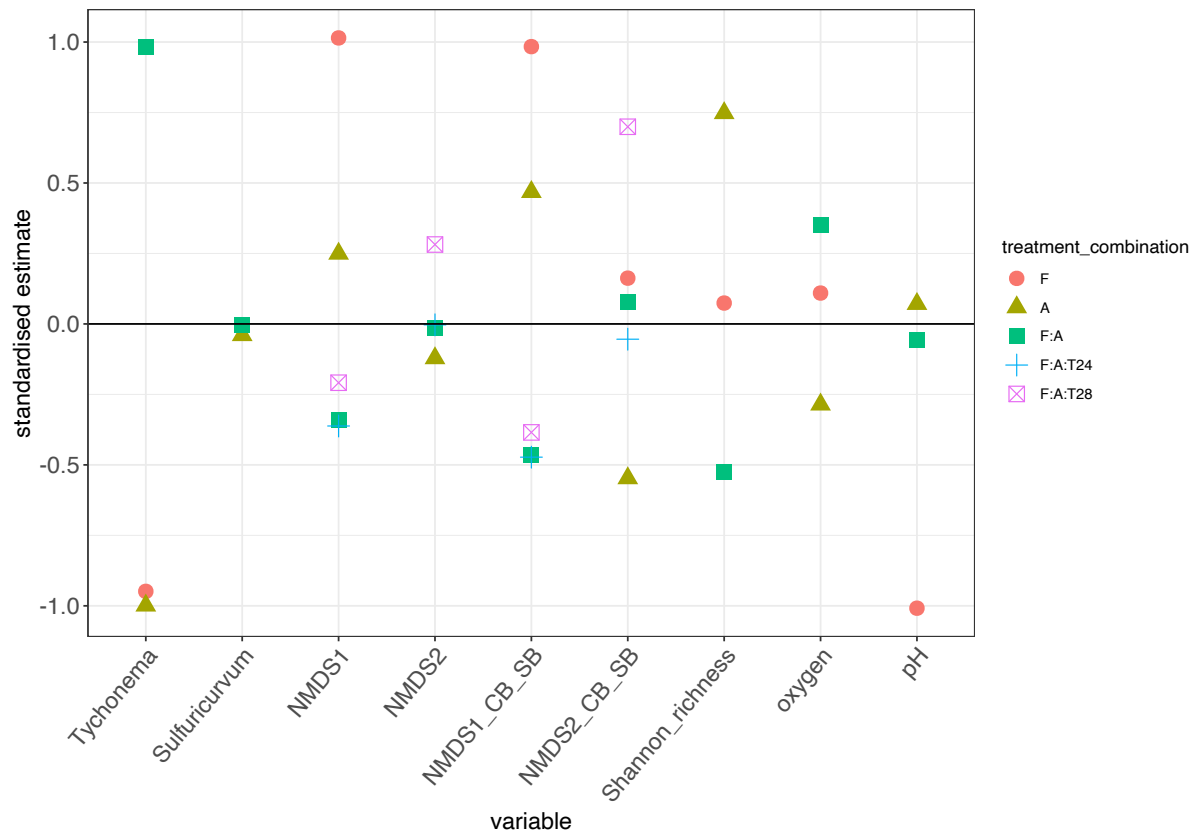

335

336 **Fig. 6 Effects of fertilizer, antibiotics and their combination at 20 °C and elevated temperature on species, microbial**  
337 **community and ecosystem variables.** Just significant treatments are shown (F-test p value < 0.05). Total nitrogen and total  
338 carbon are not listed in this figure because they were not significantly affected by F, A, and F:A.  
339

340 The effect of temperature is in our view highly important to notice, since it is  
341 predicting that observed biological consequences caused by global change can change with  
342 on-going global warming. An increase of temperature can lead to new interactions among  
343 stressor combinations (F:A with increasing temperature led again to significant affected  
344 variables) or can lead to significant effects that were not observed at 20 °C (G:M, G:M:24 and  
345 G:M:28 for NMDS1).

346 Our study also contributes to close the gap of understanding how stressors and their  
347 combination act across various levels of organisation, since our results revealed that

348 individuals can be affected differently compared to abiotic factors of the ecosystem or the  
349 microbial community composition. Therefore, our study is in line with the findings of Galic et  
350 al. (2018) who reported already differences of the influence of multiple stressors across levels  
351 of organisation. Interestingly, in our study, some treatment combinations, like fertilizer and  
352 antibiotics working simultaneously, showed significant influence across most of the different  
353 levels of organisation (except total nitrogen and total carbon).

354  
355         Stressors and how they are affecting ecosystems and communities are concentration-  
356 dependent. In this study, we did used only two levels of stressor concentration and added the  
357 stressor in a single pulse treatment. More information about specific concentration  
358 thresholds and press disturbances are important to study and may clarify some observed  
359 trends, as well as the timing of the stressor applied. In addition, responses of functional  
360 aspects of the aquatic microbial communities should be investigated in future studies, which  
361 could shed light into activated and deactivated pathways and enzymes used in microbial  
362 communities to react to changing environmental conditions.

363         In sum, our study confirmed the need of analysing the effects of multiple stressors on  
364 microbial communities, and indicate further that a broad range of levels of organisation  
365 (species, microbial community, ecosystem) should be analysed due to its variation of  
366 significant effects. Furthermore, our study showed that combination of specific stressors can  
367 change the biological consequence and direction compared to single stressors in all levels of  
368 organisation and that the effects of stressor combinations can be modified by temperature.

369

370

371

372

373 **Literature**

374

375 Brennan G, Collins S (2015) Growth responses of a green alga to multiple environmental  
376 drivers. *Nat Clim Chang* 5:892–897. <https://doi.org/10.1038/nclimate2682>

377

378 Bush T, Diao M, Allen RJ, et al (2017) Oxic-Anoxic regime shifts mediated by feedbacks  
379 between biogeochemical processes and microbial community dynamics. *Nat Commun*  
380 8:. <https://doi.org/10.1038/s41467-017-00912-x>

381

382 Callahan BJ, McMurdie PJ, Rosen MJ, et al (2016) DADA2: High-resolution sample inference  
383 from Illumina amplicon data. *Nat Methods* 13:581–583.

384 <https://doi.org/10.1038/nmeth.3869>

385

386 Christensen MR, Graham MD, Vinebrooke RD, et al (2006) Multiple anthropogenic stressors  
387 cause ecological surprises in boreal lakes. *Glob Chang Biol* 12:2316–2322.

388 <https://doi.org/https://doi.org/10.1111/j.1365-2486.2006.01257.x>

389

390 da Costa N, Fugère V, Hébert M-P, et al (2021) Resistance, resilience, and functional  
391 redundancy of freshwater bacterioplankton communities facing a gradient of  
392 agricultural stressors in a mesocosm experiment. *Mol Ecol* 30:4771–4788.

393 <https://doi.org/https://doi.org/10.1111/mec.16100>

394

395 Davis J, Sim L, Chambers J (2010) Multiple stressors and regime shifts in shallow aquatic  
396 ecosystems in antipodean landscapes. *Freshw Biol* 55:5–18.

397 <https://doi.org/https://doi.org/10.1111/j.1365-2427.2009.02376.x>

398

399 Faust K, Raes J (2012) Microbial interactions: from networks to models. *Nat Rev Microbiol*  
400 10:538–550. <https://doi.org/10.1038/nrmicro2832>

401

402 Galic N, Sullivan LL, Grimm V, Forbes VE (2018) When things don't add up: quantifying  
403 impacts of multiple stressors from individual metabolism to ecosystem processing. *Ecol*  
404 *Lett* 21:568–577. <https://doi.org/https://doi.org/10.1111/ele.12923>

405

406 Gruber N (2011) Warming up, turning sour, losing breath: ocean biogeochemistry under  
407 global change. *Philos Trans R Soc A Math Phys Eng Sci* 369:1980–1996.

408 <https://doi.org/10.1098/rsta.2011.0003>

409

410 Hutchins DA, Jansson JK, Remais J V, et al (2019) Climate change microbiology — problems  
411 and perspectives. *Nat Rev Microbiol* 17:391–396. [https://doi.org/10.1038/s41579-019-](https://doi.org/10.1038/s41579-019-0178-5)

412 [0178-5](https://doi.org/10.1038/s41579-019-0178-5)

413

414 Jackson MC, Loewen CJG, Vinebrooke RD, Chimimba CT (2016) Net effects of multiple  
415 stressors in freshwater ecosystems: a meta-analysis. *Glob Chang Biol* 22:180–189.

416 <https://doi.org/https://doi.org/10.1111/gcb.13028>

417

418

419

- 420 McMurdie PJ, Holmes S (2013) Phyloseq: An R Package for Reproducible Interactive Analysis  
421 and Graphics of Microbiome Census Data. PLoS One 8:  
422 <https://doi.org/10.1371/journal.pone.0061217>  
423
- 424 Oksanen J, Blanchet FG, Friendly M, et al (2019) Package “vegan” Title Community Ecology  
425 Package. Community Ecol Packag 2:1–297  
426
- 427 Quast C, Pruesse E, Yilmaz P, et al (2012) The SILVA ribosomal RNA gene database project:  
428 improved data processing and web-based tools. Nucleic Acids Res 41:D590–D596.  
429 <https://doi.org/10.1093/nar/gks1219>  
430
- 431 Relyea RA (2009) A cocktail of contaminants: How mixtures of pesticides at low  
432 concentrations affect aquatic communities. Oecologia 159:363–376.  
433 <https://doi.org/10.1007/s00442-008-1213-9>  
434
- 435 Richardson J, Miller C, Maberly SC, et al (2018) Effects of multiple stressors on cyanobacteria  
436 abundance vary with lake type. Glob Chang Biol 24:5044–5055.  
437 <https://doi.org/https://doi.org/10.1111/gcb.14396>  
438
- 439 Rillig MC, Ryo M, Lehmann A, et al (2019) The role of multiple global change factors in  
440 driving soil functions and microbial biodiversity. Science (80- ) 366:886–890.  
441 <https://doi.org/10.1126/science.aay2832>  
442
- 443 Shade A, Read JS, Welkie DG, et al (2011) Resistance, resilience and recovery: Aquatic  
444 bacterial dynamics after water column disturbance. Environ Microbiol 13:2752–2767.  
445 <https://doi.org/10.1111/j.1462-2920.2011.02546.x>  
446
- 447 Shade A, Read JS, Youngblut ND, et al (2012) Lake microbial communities are resilient after a  
448 whole-ecosystem disturbancefile:///Users/marcel/Downloads/10.1007\_PL00008896-  
449 citation.ris. ISME J 6:2153–2167. <https://doi.org/10.1038/ismej.2012.56>  
450
- 451 Singh BK, Dawson LA, Macdonald CA, Buckland SM (2009) Impact of biotic and abiotic  
452 interaction on soil microbial communities and functions: A field study. Appl Soil Ecol  
453 41:239–248. <https://doi.org/https://doi.org/10.1016/j.apsoil.2008.10.003>  
454
- 455 Solomon KR, Thompson DG (2003) Ecological risk assessment for aquatic organisms from  
456 over-water uses of glyphosate. J Toxicol Environ Heal - Part B Crit Rev 6:289–324.  
457 <https://doi.org/10.1080/10937400306468>  
458
- 459 Suleiman M, Brandt FB, Brenzinger K, et al (2017) Potential N<sub>2</sub>O Emissions from the Tanks of  
460 Bromeliads Suggest an Additional Source of N<sub>2</sub>O in the Neotropics. Microb Ecol  
461 73:751–754. <https://doi.org/10.1007/s00248-016-0903-9>  
462
- 463 Suleiman M, Choffat Y, Daugaard U, Petchey OL (2021a) Large and interacting effects of  
464 temperature and nutrient addition on stratified microbial ecosystems in a small,  
465 replicated, and liquid-dominated Winogradsky column approach. Microbiologyopen  
466 10:e1189. <https://doi.org/https://doi.org/10.1002/mbo3.1189>

- 467 Suleiman M, Pennekamp F, Choffat Y, Petchey OL (2021b) Contrasting resistance and  
468 resilience to light variation of the coupled oxic and anoxic components of an  
469 experimental microbial ecosystem. bioRxiv.  
470 <https://doi.org/10.1101/2021.08.13.456201>  
471
- 472 Weithoff G, Lorke A, Walz N (2000) Effects of water-column mixing on bacteria,  
473 phytoplankton, and rotifers under different levels of herbivory in a shallow eutrophic  
474 lake. *Oecologia* 125:91–100. <https://doi.org/10.1007/PL00008896>  
475
- 476 Wu Z, Dijkstra P, Koch GW, et al (2011) Responses of terrestrial ecosystems to temperature  
477 and precipitation change: a meta-analysis of experimental manipulation. *Glob Chang*  
478 *Biol* 17:927–942. <https://doi.org/https://doi.org/10.1111/j.1365-2486.2010.02302.x>  
479
- 480 Xu J, Chen Y, Zheng L, et al (2018a) Assessment of heavy metal pollution in the sediment of  
481 the main tributaries of Dongting Lake, China. *Water (Switzerland)* 10:1–16.  
482 <https://doi.org/10.3390/w10081060>  
483
- 484 Xu Z, Li T, Bi J, Wang C (2018b) Spatiotemporal heterogeneity of antibiotic pollution and  
485 ecological risk assessment in Taihu Lake Basin, China. *Sci Total Environ* 643:12–20.  
486 <https://doi.org/10.1016/j.scitotenv.2018.06.175>  
487

#### 488 **Acknowledgements**

490 MS was funded by Forschungskredit of the UZH (FK-20-125). OLP was supported by the  
491 University of Zurich Research Priority Programs in Global Change and Biodiversity. OLP and  
492 CZ were supported by Swiss National Science Foundation (Project 310030\_188431). We thank  
493 the Predictive Ecology group and especially Uriah Daugaard for valuable input and data  
494 analysis support. We thank the Functional Genomic Center Zurich for sequencing efforts.

495  
496

#### 497 **Author contribution**

498  
499 OLP and MS planned the experimental set-up. MS performed all experiments in the lab. MS  
500 performed the up- and downstream bioinformatics. MS and OLP performed the data analysis.  
501 YC provided technical support and performed the TOC analysis. XZ performed the DNA  
502 extractions and provided technical support. OLP and MS drafted the manuscript. All authors  
503 confirmed the final version of the manuscript.

504 **Competing interests**

505 The authors declare no competing financial interests.

506

507 **Supplementary Information**

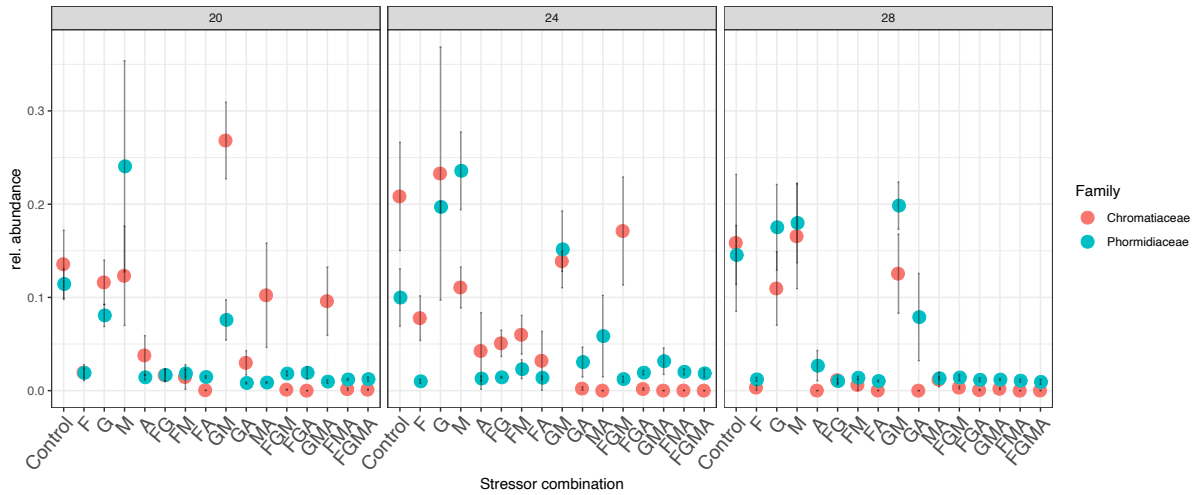

508

509 **Supplementary Fig. 1** Relative abundance of Chromatiaceae and Phormidiaceae in the micro-ecosystem depending on  
 510 stressor combination and temperature. Mean is shown by the circle, standard errors are shown, n=5)

511

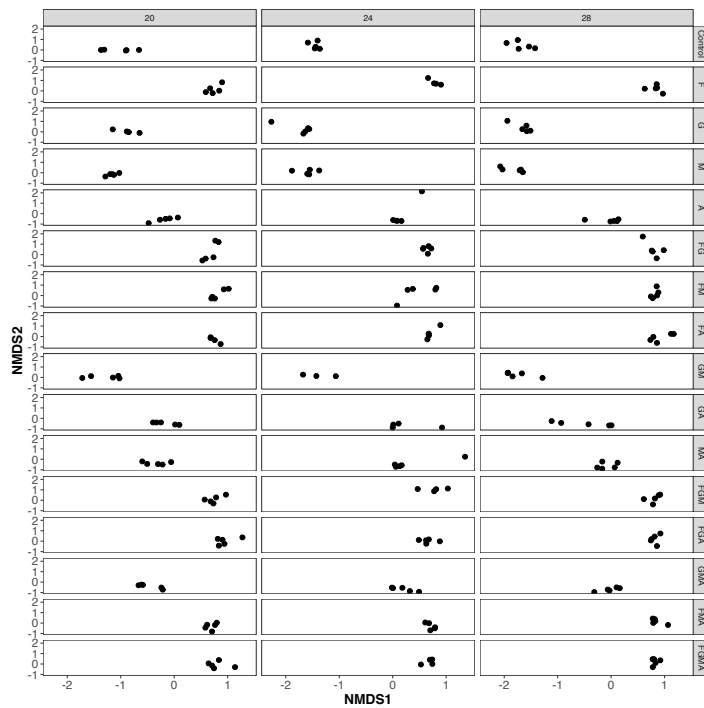

512

513 **Supplementary Fig. 2** Beta-diversity based on NMDS analysis (Bray-Curtis) in relation to temperature and stressor  
 514 combinations. Stress is 0.16

515

516

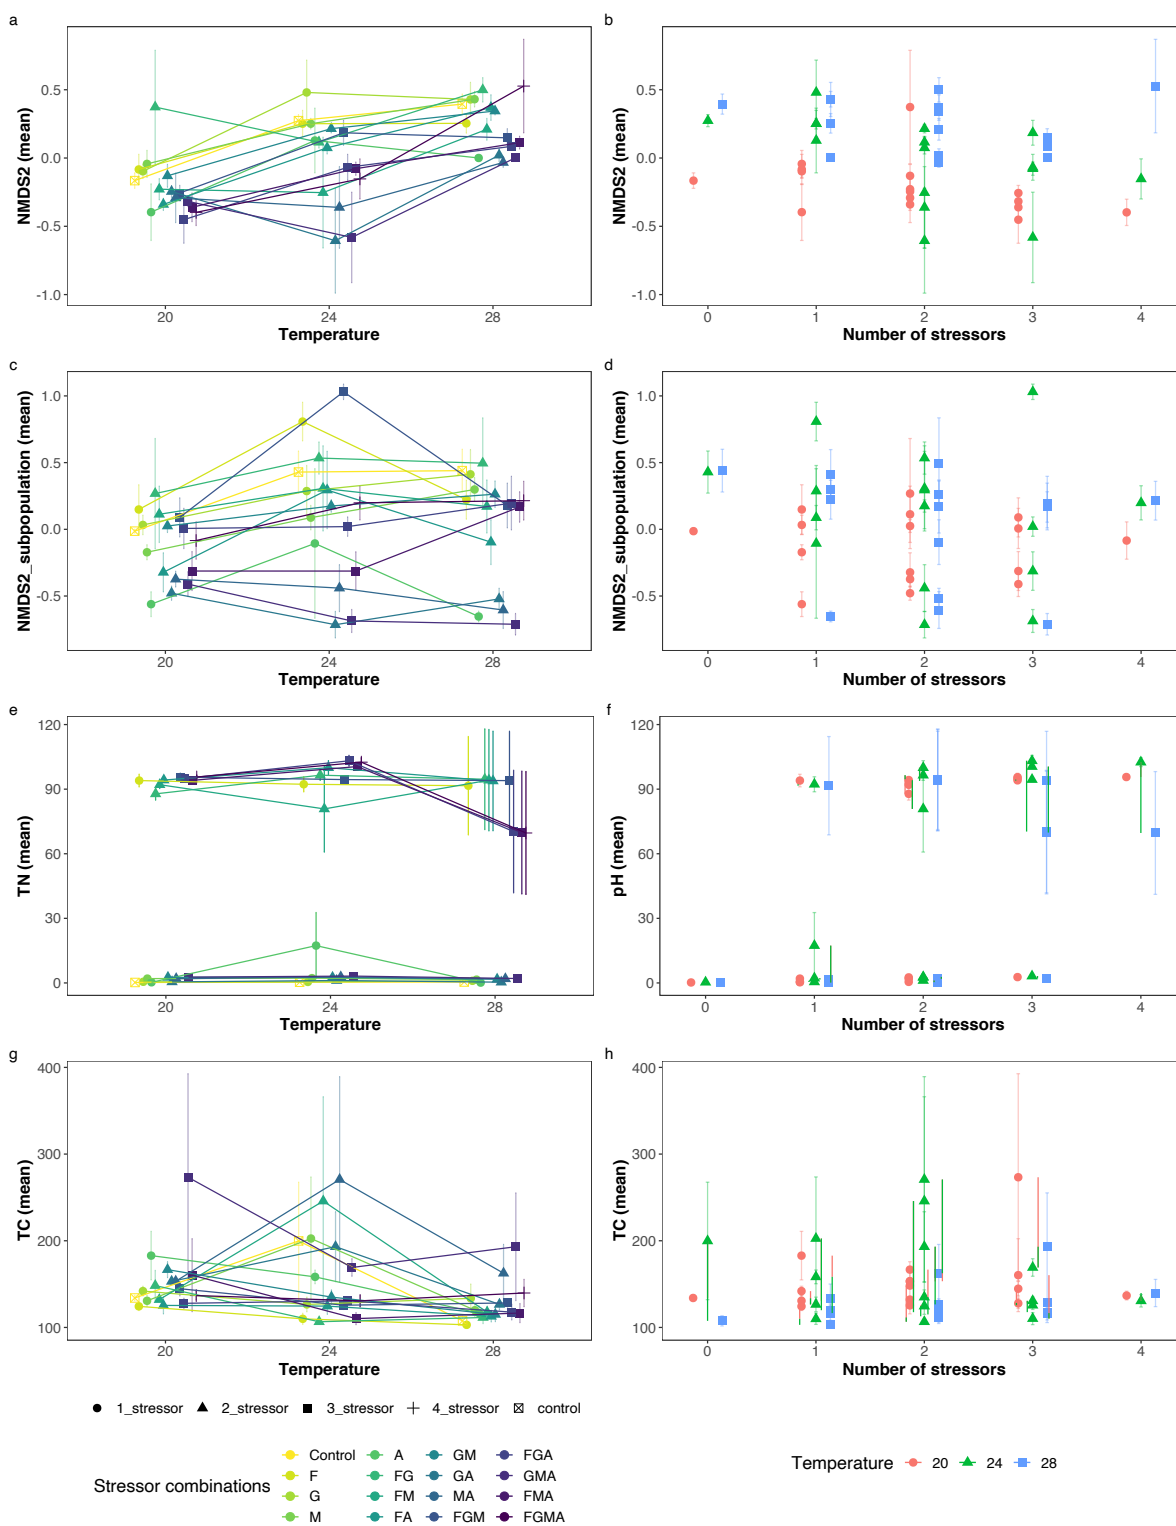

517  
518  
519  
520  
521  
522  
523  
524  
525  
526

**Supplementary Fig. 3 Effects of stressor combination and number of stressors on temperature applied for microbial community and ecosystem variables.** NMDS2 scores in dependence on (a) temperature and stressor combination and (b) temperature and number of stressors. NMDS2\_subpopulation scores in dependence on (c) temperature and stressor combination and (d) temperature and number of stressors. Total nitrogen concentration in dependence on (e) temperature and stressor combination and (f) temperature and number of stressors. Total carbon concentration in dependence on (g) temperature and stressor combination and (h) temperature and number of stressors. Standard errors are shown (n = 5 replicates).
